# Supplementary material for: Functional States of the Genome-Scale Escherichia Coli Transcriptional Regulatory System
Source: PLoS Comput Biol. 2009 Jun 5;5(6):e1000403. doi: 10.1371/journal.pcbi.1000403 (PMC2685017; doi:10.1371/journal.pcbi.1000403)
Supplement: Dataset S3 — Anaerobic and aerobic minimal media. These anaerobic and aerobic minimal media conditions (reported in [13]) were used to validate our R matrix representation of the E. coli transcriptional regulatory system. (0.04 MB XLS) [file pcbi.1000403.s003.xls]

## Sheet: Anaerobic-aerobic minimal media
Metabolite
No.	Abbreviation	Full name	Anaerobic	Aerobic
1	2ddglcn_e_gt_0	2-Dehydro-3-deoxy-D-gluconate	1	1		(0 -- absent; 1 -- present)
2	3hpppn_e_gt_0	3-(3-hydroxy-phenyl)propionate	0	1
3	5dglcn_e_gt_0	5-Dehydro-D-gluconate	0	0
4	ac_e_gt_0	Acetate	0	1
5	acac_e_gt_0	Acetoacetate	0	1
6	acgam_e_gt_0	N-Acetyl-D-glucosamine	1	1
7	ade_e_gt_0	Adenine	0	0
8	AGDC_I_gt_0	N-Acetylglucosoamine-6-Phosphate Deacetylase	0	0
9	ala-D_e_gt_0	D-Alanine	0	1
10	ala-L_e_gt_0	L-Alanine	0	1
11	all-D_e_gt_0	D-Allose	0	0
12	alltn_e_gt_0	Allantoin	0	0
13	ALTRH_I_gt_0	Altronate Hydrolase	0	0
14	arab-L_e_gt_0	L-Arabinose	1	1
15	arg-L_e_gt_0	L-Arginine	0	1
16	ascb-L_e_gt_0	L-Ascorbate	0	0
17	asn-L_e_gt_0	L-Asparagine	0	1
18	asp-L_e_gt_0	L-Aspartate	0	1
19	cbi_e_gt_0	Cobinamide	0	0
20	chol_e_gt_0	Choline	0	0
21	cit_e_gt_0	Citrate	0	1
22	cynt_e_gt_0	Cyanate	0	0
23	cys-L_e_gt_0	L-Cysteine	0	0
24	cytd_e_gt_0	Cytidine	1	1
25	dipyridyl_gt_0	Dipyridyl	0	0
26	dmso_e_gt_0	Dimethyl sulfoxide	0	0
27	etoh_e_gt_0	Ethanol	0	0
28	FBP_I_gt_0	Fructose-Biphosphate	0	0
29	fe2_e_gt_0	Fe2+	0	0
30	for_e_gt_0	Formate	0	0
31	fru_e_gt_0	D-Fructose	1	1
32	fuc-L_e_gt_0	L-Fucose	1	1
33	fum_e_gt_0	Fumarate	0	1
34	g6p_e_gt_0	D-Glucose 6-phosphate	1	1
35	gal_e_gt_0	D-Galactose	1	1
36	galct-D_e_gt_0	D-Galactarate	1	1
37	galctn-D_e_gt_0	D-Galactonate	1	1
38	galt_e_gt_0	Galactitol	1	1
39	gam_e_gt_0	D-Glucosamine	1	1
40	glc-D_e_gt_0	D-Glucose	1	1
41	glcn_e_gt_0	D-Gluconate	1	1
42	GLCptspp_I_gt_0	D-Glucose Transport via PEP:Pyr PTS (periplasm)	0	0
43	glcr_e_gt_0	D-Glucarate	1	1
44	gly_e_gt_0	Glycine	0	1
45	glyc_e_gt_0	Glycerol	0	1
46	glyclt_e_gt_0	Glycolate	0	1
47	glyc-R_e_gt_0	(R)-Glycerate	0	0
48	Growth_gt_0	Growth conditions	0	0
49	gua_e_gt_0	Guanine	0	0
50	GUI1_R_gt_0	Glucuronate Isomerase (D-Glucuronate) present	0	0
51	GUI1_R_lt_0	Glucuronate Isomerase (D-Glucuronate) absent	1	1
52	GUI2_R_gt_0	Glucuronate Isomerase (D-Galacturonate) present	0	0
53	GUI2_R_lt_0	Glucuronate Isomerase (D-Galacturonate) absent	1	1
54	h2o2_e_gt_0	Hydrogen peroxide	0	0
55	hdca_e_gt_0	Hexadecanoate (n-C16:0)	0	1
56	heat_shock_gt_0	Heat Shock conditions	0	0
57	high_NAD_gt_0	High NAD conditions	0	0
58	hxan_e_gt_0	Hypoxanthine	0	0
59	idon-L_e_gt_0	L-Idonate	1	1
60	ile-L_e_gt_0	L-Isoleucine	0	0
61	ins_e_gt_0	Inosine	1	1
62	k_e_gt_1	potassium	0	0
63	lac-D_e_gt_0	D-Lactate	0	1
64	lac-L_e_gt_0	L-Lactate	0	1
65	lcts_e_gt_0	Lactose	1	1
66	LDH_D_R_lt_0	D-Lactate Dehydrogenase absent	1	1
67	LDH_D2_I_gt_0	D-Lactate Dehydrogenase present	0	0
68	leu-L_e_gt_0	L-Leucine	0	0
69	lys-L_e_gt_0	L-Lysine	0	0
70	mal-L_e_gt_0	L-Malate	0	1
71	malt_e_gt_0	Maltose	1	1
72	malthx_e_gt_0	Maltohexaose	1	1
73	maltpt_e_gt_0	Maltopentaose	1	1
74	malttr_e_gt_0	Maltotriose	1	1
75	maltttr_e_gt_0	Maltotetraose	1	1
76	MANAO_R_gt_0	Mannonate oxidoreductase present	0	0
77	MANAO_R_lt_0	Mannonate oxidoreductase absent	1	1
78	manglyc_e_gt_0	2(alpha-D-Mannosyl)-D-glycerate	0	0
79	ME1_I_gt_0	Malic Enzyme (NAD)	0	0
80	ME2_I_gt_0	Malic Enzyme (NADP)	0	0
81	melib_e_gt_0	Melibiose	1	1
82	met-L_e_gt_0	L-Methionine	0	0
83	mnl_e_gt_0	D-Mannitol	0	1
84	MNNH_I_gt_0	D-Mannonate Hydrolyase	0	0
85	na1_e_gt_0	Sodium	0	0
86	nh4_e_gt_0	Ammonium (> 0 units conc.)	0	0
87	nh4_e_gt_2	Ammonium (> 2 units conc.)	0	0
88	no2_e_gt_0	Nitrite	0	0
89	no3_e_gt_0	Nitrate	0	0
90	o2_e_gt_0	O2	0	1
91	Oxidative_Stress_gt_0	Oxidative Stress conditions	0	0
92	PFK_I_gt_0	Phosphofructokinase	0	0
93	PGI_R_gt_0	Glucose-6-phosphate isomerase	0	0
94	pH_lt_4	pH < 4	0	0
95	pH_lt_7	pH < 7	0	0
96	phe-L_e_gt_0	L-Phenylalanine	0	0
97	pi_e_lt_0.000000004	Phosphate	0	0
98	ppa_e_gt_0	Propionate (n-C3:0)	0	0
99	PPM2_R_gt_0	Phosphopentomutase 2 (deoxyribose) present	0	0
100	PPM2_R_lt_0	Phosphopentomutase 2 (deoxyribose) absent	1	1
101	pppn_e_gt_0	Phenylpropanoate	0	1
102	pro-L_e_gt_0	L-Proline	0	1
103	PYK_I_gt_0	Pyruvate kinase	0	0
104	pyr_e_gt_0	Pyruvate	0	1
105	rib-D_e_gt_0	D-Ribose	1	1
106	Rich_Medium_gt_0	Rich Medium conditions	0	0
107	rmn_e_gt_0	L-Rhamnose	1	1
108	Salicylate_gt_0	Salycylate	0	0
109	sbt-D_e_gt_0	D-Sorbitol	1	1
110	ser-D_e_gt_0	D-Serine	0	1
111	ser-L_e_gt_0	L-Serine	0	1
112	so4_e_gt_0	Sulfate	0	0
113	Stress_gt_0	Stress conditions	0	0
114	succ_e_gt_0	Succinate	0	1
115	SUCCt2_2pp_I_gt_0	Succinate Transport via Proton Symport (2H) (periplasm)	0	0
116	SUCCt2_3pp_I_gt_0	Succinate Transport via Proton Symport (3H) (periplasm)	0	0
117	TAGURr_R_gt_0	Tagaturonate Reductase present	0	0
118	TAGURr_R_lt_0	Tagaturonate Reductase absent	1	1
119	TALA_R_gt_0	Transaldolase	0	0
120	tartr-L_e_gt_0	L-tartrate	0	1
121	thr-L_e_gt_0	L-Threonine	0	1
122	TIME_lt_0HRS	Time < 0 hrs	0	0
123	TKT2_R_gt_0	Transketolase	0	0
124	tmao_e_gt_0	Trimethylamine N-oxide	0	0
125	tre_e_gt_0	Trehalose	1	1
126	trp-L_e_gt_0	L-Tryptophan	0	1
127	ttdca_e_gt_0	tetradecanoate (n-C14:0)	0	1
128	tyr-L_e_gt_0	L-Tyrosine	0	0
129	val-L_e_gt_0	L-Valine	0	0
130	xtsn_e_gt_0	Xanthosine	1	1
131	xyl-D_e_gt_0	D-Xylose	1	1
132	csn_e_gt_0	Cytosine	0	0
133	gln-L_e_gt_0	L-Glutamine	0	1
134	glu-L_e_gt_0	L-Glutamate	0	1
135	his-L_e_gt_0	L-Histidine	0	0
136	LBMedia_gt_0	LB Media	0	0
137	LBMedia_lt_0	LB Media	1	1
138	man_e_gt_0	D-Mannose	1	1
139	ocdca_e_gt_0	Octadecanoate (n-C18:0)	0	1
140	phe-L_e_gt_10	L-Phenylalanine	0	0
141	pi_e_gt_0	Phosphate	0	0
142	Stringent_gt_0	Stringent conditions	0	0
143	Stringent_lt_0	Stringent conditions	1	1
144	thym_e_gt_0	Thymine	0	0
145	TIME_lt_0SECS	Time < 0 secs	0	0
146	ura_e_gt_0	Uracil	0	0
147	ocdca_e_t_0	Octadecanoate (n-C18:0)	0	1
