# Supplementary material for: Functional States of the Genome-Scale Escherichia Coli Transcriptional Regulatory System
Source: PLoS Comput Biol. 2009 Jun 5;5(6):e1000403. doi: 10.1371/journal.pcbi.1000403 (PMC2685017; doi:10.1371/journal.pcbi.1000403)
Supplement: Dataset S4 — Gene legend for Figure 5A. A legend that defines the genes as they are presented in the differential gene expression diagrams in Figure 5A is provided. (0.03 MB XLS) [file pcbi.1000403.s004.xls]

## Sheet: Gene legend for Figure 5A
AdiY	b0366	b0904	b1744	b2285	b2799	b3458	b3908	b4254	GutR
AllR	b0367	b0907	b1745	b2286	b2800	b3460	b3909	b4265	HcaR
AllS	b0368	b0931	b1746	b2287	b2801	b3500	b3917	b4266	IclR
AppY	b0383	b0945	b1747	b2288	b2802	b3517	b3926	b4267	IdnR
AraC	b0388	b0954	b1748	b2306	b2803	b3519	b3939	b4321	IlvY
ArcA	b0403	b0972	b1761	b2307	b2818	b3526	b3940	b4322	KdgR
ArgR	b0428	b0973	b1805	b2308	b2838	b3528	b3942	b4323	KdpD
AsnC	b0429	b0974	b1814	b2309	b2841	b3564	b3951	b4381	KdpE
AtoC	b0430	b0978	b1817	b2310	b2903	b3565	b3952	b4382	LacI
AtoS	b0431	b0979	b1818	b2311	b2904	b3566	b3957	b4383	Lrp
b0002	b0432	b0980	b1819	b2312	b2905	b3567	b3958	b4384	LysR
b0003	b0505	b0996	b1849	b2323	b2926	b3568	b3959	BetI	MalI
b0004	b0507	b0997	b1850	b2341	b2927	b3572	b3960	CadC	MalT
b0019	b0509	b1014	b1851	b2342	b2938	b3575	b4005	CaiF	MarA
b0030	b0512	b1015	b1896	b2344	b2943	b3579	b4013	Cbl	MelR
b0031	b0514	b1062	b1897	b2366	b2957	b3581	b4014	CitA	MetJ
b0032	b0516	b1091	b1898	b2393	b2964	b3583	b4015	CitB	MetR
b0033	b0517	b1092	b1899	b2406	b2965	b3588	b4019	CpxR	MhpR
b0036	b0522	b1093	b1900	b2407	b2975	b3599	b4024	Cra	Mlc
b0038	b0523	b1095	b1901	b2413	b2976	b3600	b4031	Crp	MngR
b0040	b0583	b1101	b1907	b2414	b2987	b3603	b4032	CRP_GLCN	MtlR
b0052	b0593	b1109	b1991	b2421	b2994	b3605	b4033	CRP_noARAB	Nac
b0061	b0594	b1131	b1992	b2422	b2997	b3607	b4034	CRP_noGL	NadR
b0062	b0595	b1189	b1993	b2423	b3008	b3616	b4035	CRP_noGLC	NagC
b0063	b0596	b1190	b2066	b2424	b3061	b3617	b4036	CRP_noGLCN	NarL
b0071	b0612	b1197	b2087	b2425	b3062	b3642	b4039	CRP_noGLT	NhaR
b0072	b0615	b1207	b2090	b2476	b3073	b3653	b4040	CRP_noLAC	OmpR
b0073	b0616	b1223	b2091	b2492	b3091	b3666	b4054	CRP_noMAL	OxyR
b0074	b0617	b1224	b2092	b2499	b3092	b3670	b4067	CRP_noMAN	PdhR
b0077	b0621	b1225	b2093	b2500	b3093	b3671	b4069	CRP_noRIB	PhoB
b0078	b0651	b1226	b2094	b2507	b3111	b3691	b4079	CRP_noSUCC	PhoR
b0104	b0652	b1227	b2095	b2508	b3112	b3692	b4085	CRP_noXYL	PurR
b0112	b0653	b1233	b2096	b2538	b3114	b3693	b4086	CynR	RbsR
b0114	b0654	b1241	b2097	b2539	b3115	b3708	b4087	CysB	RhaR
b0115	b0655	b1260	b2143	b2540	b3116	b3709	b4088	CytR	RhaS
b0118	b0677	b1261	b2148	b2541	b3117	b3725	b4090	DcuR	Rob
b0124	b0678	b1262	b2149	b2542	b3124	b3726	b4111	DcuS	RpiR
b0125	b0679	b1263	b2150	b2551	b3125	b3727	b4115	DeoR	RpoE
b0180	b0696	b1264	b2167	b2557	b3126	b3728	b4117	DsdC	RpoN
b0197	b0697	b1276	b2168	b2564	b3128	b3730	b4119	ExuR	RpoS
b0198	b0698	b1288	b2169	b2574	b3161	b3744	b4120	FadR	SdaR
b0199	b0721	b1386	b2210	b2599	b3212	b3748	b4122	FadR2	SoxR
b0221	b0722	b1474	b2221	b2600	b3213	b3749	b4123	FeaB	SoxS
b0273	b0723	b1475	b2222	b2601	b3236	b3750	b4131	FeaR	Surplus_FDP
b0312	b0724	b1476	b2223	b2702	b3359	b3751	b4132	FhlA	Surplus_PYR
b0314	b0731	b1493	b2224	b2703	b3365	b3752	b4139	Fis	TdcA
b0331	b0732	b1519	b2232	b2704	b3366	b3767	b4151	Fnr	TdcR
b0333	b0733	b1521	b2234	b2705	b3367	b3768	b4152	FucR	TorR
b0334	b0734	b1524	b2235	b2719	b3368	b3769	b4153	Fur	TorS
b0335	b0754	b1588	b2239	b2720	b3416	b3774	b4154	GalR	TreR
b0336	b0757	b1589	b2240	b2721	b3417	b3806	b4177	GalS	TrpR
b0337	b0758	b1590	b2241	b2722	b3425	b3829	b4192	GatR	TyrR
b0340	b0759	b1611	b2242	b2723	b3426	b3831	b4193	GcvA	UhpA
b0341	b0774	b1612	b2243	b2724	b3428	b3845	b4194	GcvR	UhpB
b0343	b0775	b1621	b2276	b2750	b3437	b3846	b4195	GlcC	UlaR
b0344	b0776	b1622	b2277	b2751	b3450	b3870	b4196	GlnB	UxuR
b0347	b0778	b1623	b2278	b2752	b3451	b3892	b4197	GlnD	XapR
b0348	b0871	b1646	b2279	b2762	b3452	b3893	b4198	GlnG	XylR
b0349	b0894	b1676	b2280	b2763	b3453	b3894	b4238	GlnL	YiaJ
b0350	b0895	b1701	b2281	b2764	b3454	b3902	b4239	GlpR	NRI_hi
b0351	b0896	b1702	b2282	b2787	b3455	b3903	b4240	GntR	NRI_low
b0352	b0902	b1704	b2283	b2796	b3456	b3904	b4244	GntT	NOT_BirA
b0365	b0903	b1732	b2284	b2797	b3457	b3907	b4245	GutM
