# Supplementary material for: Functional States of the Genome-Scale Escherichia Coli Transcriptional Regulatory System
Source: PLoS Comput Biol. 2009 Jun 5;5(6):e1000403. doi: 10.1371/journal.pcbi.1000403 (PMC2685017; doi:10.1371/journal.pcbi.1000403)
Supplement: Dataset S5 — Interesting genes identified from expression states predicted for randomly-sampled environments. Figure 6A illustrates (rank-ordered) the percentage of the 1000 randomly-sampled environments in which the 629 regulated genes within the R matrix model are expressed. Genes that were always expressed, never expressed, or expressed in about 50 percent of the randomly-simulated environments are listed here. (0.21 MB XLS) [file pcbi.1000403.s005.xls]

## Sheet: Interesting genes
Gene	Percent	GO category	Gene name
b0733	100	Energy metabolism (carbon)	CydA cytochrome bd-I terminal oxidase subunit I
b0734	100	Energy metabolism (carbon)	CydB cytochrome bd-I terminal oxidase subunit II
b0774	100	Building block biosynthesis	BioA adenosylmethionine-8-amino-7-oxononanoate aminotransferase monomer
b0775	100	Building block biosynthesis	BioB biotin synthase monomer
b0776	100	Building block biosynthesis	BioF 8-amino-7-oxononanoate synthase monomer
b0778	100	Building block biosynthesis	BioD dethiobiotin synthetase monomer
b1241	100	Carbon compound utilization	AdhE PFL-deactivase/alcohol dehydrogenase/acetaldehyde dehydrogenase subunit
b2943	100	Carbon compound utilization	GalP galactose MFS transporter
b3114	100	Carbon compound utilization	TdcE 2-ketobutyrate formate-lyase/pyruvate formate-lyase
b3115	100	Carbon compound utilization	TdcD propionate kinase
b3116	100	Building block biosynthesis	TdcC threonine STP transporter
b3117	100	Carbon compound utilization	TdcB catabolic threonine dehydratase
b3212	100	Building block biosynthesis	GltB glutamate synthase, large subunit
b3213	100	Building block biosynthesis	GltD glutamate synthase, small subunit
b0871	51	Energy metabolism (carbon)	PoxB pyruvate oxidase monomer
b1197	51	Carbon compound utilization	TreA periplasmic trehalase
b1519	51	Central intermediary metabolism	Tam trans-aconitate methyltransferase
b1732	51	Protection	KatE heme d synthase/hydroperoxidase
b1896	51	Central intermediary metabolism	OtsA trehalose-6-phosphate synthase
b1897	51	Central intermediary metabolism	OtsB trehalose-6-phosphate phosphatase, biosynthetic
b2987	51	Metabolism of other compounds	PitB phosphate transporter
b3519	51	Carbon compound utilization	TreF cytoplasmic trehalase
RpoS	51	RNA related	RpoS RNA polymerase, sigma S (sigma 38) factor
b0331	50.9	Carbon compound utilization	PrpB 2-methylisocitrate lyase
b0333	50.9	Carbon compound utilization	PrpC methylcitrate synthase
b0334	50.9	Carbon compound utilization	PrpD 2-methylcitrate dehydratase
b0335	50.9	Cytoplasm	PrpE putative propionyl-CoA synthetase
CytR	50.9	Central intermediary metabolism	CytR transcriptional dual regulator
GcvR	50.9	Carbon compound utilization	GcvR predicted transcriptional regulator
b3774	50.8	Building block biosynthesis	IlvC acetohydroxy acid isomeroreductase
IlvY	50.8	Building block biosynthesis	IlvY DNA binding transcriptional dual regulator/2-acetolactate DNA binding transcriptional dual regulator
UhpA	50.8	Carbon compound utilization	UhpA transcriptional activator
UhpB	50.8	Carbon compound utilization	UhpB transcriptional activator
b0696	50.7	Primary Active Transporters	KdpC potassium ion P-type ATPase transporter subunit
b0697	50.7	Primary Active Transporters	KdpB potassium ion P-type ATPase transporter subunit
b0698	50.7	Primary Active Transporters	KdpA potassium ion P-type ATPase transporter subunit
KdpD	50.7	Type of regulation	KdpD potassium ion P-type ATPase transporter subunit
KdpE	50.7	RNA related	KdpE transcriptional activator
OmpR	50.7	RNA related	OmpR transcriptional dual regulator
b0221	50.6	Carbon compound utilization	FadE acyl-CoA dehydrogenase
b0428	50.6	Building block biosynthesis	CyoE heme O synthase
b0429	50.6	Energy metabolism (carbon)	CyoD cytochrome bo terminal oxidase subunit IV
b0430	50.6	Energy metabolism (carbon)	CyoC cytochrome bo terminal oxidase subunit III
b0431	50.6	Energy metabolism (carbon)	CyoB cytochrome bo terminal oxidase subunit I
b0432	50.6	Energy metabolism (carbon)	CyoA cytochrome bo terminal oxidase subunit II
b1109	50.6	Energy metabolism (carbon)	Ndh NADH:ubiquinone oxidoreductase II
b1612	50.6	Energy metabolism (carbon)	FumA fumarase A monomer
b1814	50.6	Carbon compound utilization	SdaA L-serine deaminase I
b2210	50.6	Energy metabolism (carbon)	Mqo malate:quinone oxidoreductase
b2234	50.6	Building block biosynthesis	NrdA ribonucleoside-diphosphate reductase B1 protein
b2235	50.6	Building block biosynthesis	NrdA ribonucleoside-diphosphate reductase B2 protein
b3236	50.6	Carbon compound utilization	Mdh malate dehydrogenase
b3603	50.6	Carbon compound utilization	LldP lactate transporter
b3616	50.6	Carbon compound utilization	Tdh threonine dehydrogenase subunit
b3617	50.6	Carbon compound utilization	Kbl 2-amino-3-ketobutyrate CoA ligase subunit
AraC	50.5	Carbon compound utilization	AraC transcriptional dual activator
b0061	50.5	Carbon compound utilization	AraD L-ribulose 5-phosphate 4-epimerase monomer
b0062	50.5	Carbon compound utilization	AraA L-arabinose isomerase monomer
b0063	50.5	Carbon compound utilization	AraB L-ribulokinase monomer
b1898	50.5	Carbon compound utilization	AraH high-affinity L-arabinose transport protein (ABC superfamily, membrane), subunit of arabinose ABC transporter
b1899	50.5	Carbon compound utilization	AraH high-affinity L-arabinose transport protein (ABC superfamily, membrane), subunit of arabinose ABC transporter
b1900	50.5	Carbon compound utilization	AraG arabinose ABC transporter subunit
b1901	50.5	Carbon compound utilization	AraF arabinose ABC transporter subunit
TorR	50.5	Energy metabolism (carbon)	TorR transcriptional dual regulator
TorS	50.5	Energy metabolism (carbon)	TorS hybrid sensory histidine kinase in two-component regulatory system with TorR/subunit of TorS multimer
b0931	50.4	Central intermediary metabolism	PncB nicotinate phosphoribosyltransferase
b2091	50.4	Carbon compound utilization	BglA 6-phospho-β-glucosidase A
b2092	50.4	Carbon compound utilization	GatC galactitol PTS permease subunit
b2093	50.4	Carbon compound utilization	GatB galactitol PTS permease subunit
b2094	50.4	Carbon compound utilization	GatA galactitol PTS permease subunit
b2095	50.4	Carbon compound utilization	GatZ tagatose-1,6-bisphosphate aldolase 2 subunit
b2096	50.4	Carbon compound utilization	GatY tagatose-1,6-bisphosphate aldolase 2 subunit
b2574	50.4	Building block biosynthesis	NadB L-aspartate oxidase
MetJ	50.4	Building block biosynthesis	MetJ transcriptional repressor
AllR	50.3	RNA related	AllR transcriptional repressor
Rob	50.3	DNA related	Rob transcriptional activator
b1907	50.2	Building block biosynthesis	TyrP tyrosine ArAAP transporter
b4115	50.2	Building block biosynthesis	AdiC arginine:agmatine antiporter subunit
MngR	50.2	Carbon compound utilization	MngR transcriptional repressor
ArgR	50	Building block biosynthesis	ArgR transcriptional dual regulator
b0032	50	Building block biosynthesis	CarA carbamoyl phosphate synthetase subunit
b0033	50	Building block biosynthesis	CarB carbamoyl phosphate synthetase subunit
b0273	50	Building block biosynthesis	ArgF ornithine carbamoyltransferase subunit
b2818	50	cryptic genes	ArgA acetyl-CoA:L-glutamate N-acetyltransferase/amino-acid-N-acetyltransferase
b3359	50	Building block biosynthesis	ArgD N-succinyldiaminopimelate-aminotransferase/acetylornithine transaminase is a bifunctional enzyme catalyzing amination steps in lysine, ornithine, and arginine biosynthesis
b3902	50	Carbon compound utilization	RhaD rhamnulose-1-phosphate aldolase monome
b3903	50	Carbon compound utilization	RhaA L-rhamnose isomerase
b3904	50	Carbon compound utilization	RhaB L-rhamnulose kinase
b3907	50	Carbon compound utilization	RhaT rhamnose transporter
b3957	50	Building block biosynthesis	ArgE acetylornithine deacetylase subunit
b3958	50	Building block biosynthesis	ArgC N-acetylglutamylphosphate reductase
b3959	50	Building block biosynthesis	ArgB acetylglutamate kinase monomer
b3960	50	Building block biosynthesis	ArgH argininosuccinate lyase
b4254	50	Building block biosynthesis	ArgI ornithine carbamoyltransferase subunit
RhaR	50	Carbon compound utilization	RhaR transcriptional activator
RhaS	50	Carbon compound utilization	RhaS transcriptional activator
b3564	49.9	Carbon compound utilization	XylB xylulokinase
b3565	49.9	Carbon compound utilization	XylA xylose isomerase subunit
b3566	49.9	Carbon compound utilization	XylF XylF/XylG/XylH xylose ABC transporter subunit
b3567	49.9	Carbon compound utilization	XylG XylF/XylG/XylH xylose ABC transporter subunit
b3568	49.9	Carbon compound utilization	XylH XylF/XylG/XylH xylose ABC transporter subunit
b4031	49.9	Carbon compound utilization	XylE xylose MFS transporter
XylR	49.9	Carbon compound utilization	XylR transcriptional activator
b0731	49.8	Carbon compound utilization	MngA 2-O-α-mannosyl-D-glycerate transporting phosphotransferase system subunit
b0732	49.8	Carbon compound utilization	MngB α-mannosidase
b2366	49.8	Carbon compound utilization	DsdA D-serine deaminase
DsdC	49.8	Carbon compound utilization	DsdC DNA-binding transcriptional dual regulator
b0118	49.7	Carbon compound utilization	AcnB aconitase B
b0505	49.7	Carbon compound utilization	AllA ureidoglycolase
b0507	49.7	Carbon compound utilization	Gcl glyoxylate carboligase
b0509	49.7	Carbon compound utilization	GlxR tartronate semialdehyde reductase 2
b0512	49.7	Carbon compound utilization	AllB allantoinase monomer
b0514	49.7	Carbon compound utilization	GlxK glycerate kinase II
b2926	49.7	Energy metabolism (carbon)	Pgk phosphoglycerate kinas
b3073	49.7	Central intermediary metabolism	YgjG putrescine aminotransferase/diamine transaminase
GlnL	49.7	Metabolism of other compounds	GlnL unphosphorylated kinase-phosphotransferase nitrogen regulator II
GutM	49.7	Carbon compound utilization	GutM transcriptional activator
RpoN	49.7	Metabolism of other compounds	RpoN RNA polymerase, sigma 54 (sigma N) factor
AtoC	49.6	Carbon compound utilization	AtoC transcriptional activator/Az protein inhibitor of ODC
AtoS	49.6	Carbon compound utilization	AtoS hybrid sensory histidine kinase in two-component regulatory system with AtoC/subunit of AtoS multimer
b0197	49.6	Primary Active Transporters	MetQ L- and D-methionine uptake ABC permease subunit
b0198	49.6	Primary Active Transporters	MetI L- and D-methionine uptake ABC permease subunit
b0199	49.6	Primary Active Transporters	MetN L- and D-methionine uptake ABC permease subunit
b2087	49.6	Carbon compound utilization	GatR negative DNA-binding transcriptional regulator of galactitol metabolism (subunit 1)
b2090	49.6	Carbon compound utilization	GatR transcriptional repressor (subunit 2)
b2221	49.6	Carbon compound utilization	AtoD acetyl-CoA:acetoacetyl-CoA transferase, α subunit
b2222	49.6	Carbon compound utilization	AtoA acetyl-CoA:acetoacetyl-CoA transferase, β subunit
b2223	49.6	Carbon compound utilization	AtoE predicted short chain fatty acid transporter
b2224	49.6	Carbon compound utilization	AtoB acetyl-CoA acetyltransferase
b3008	49.6	Carbon compound utilization	MetC L-cysteine desulfhydrase/cystathionine-β-lyase
b3829	49.6	Building block biosynthesis	MetE Cobalamin-independent homocysteine transmethylase
b3939	49.6	Carbon compound utilization	MetB O-succinylhomoserine lyase/O-succinylhomoserine(thiol)-lyase
b3940	49.6	Building block biosynthesis	MetO aspartate kinase/homoserine dehydrogenase
b4013	49.6	Building block biosynthesis	MetA homoserine O-succinyltransferase
b4019	49.6	Building block biosynthesis	MetH Cobalamin-dependent homocysteine transmethylase
GatR	49.6	Carbon compound utilization	GatR transcriptional repressor
MetR	49.6	Building block biosynthesis	MetR transcriptional dual regulator
NadR	49.6	RNA related	NadR transcriptional repressor
ArcA	49.4	RNA related	ArcA transcriptional dual regulator
b0071	49.4	Building block biosynthesis	LeuD isopropylmalate isomerase subunit
b0072	49.4	Building block biosynthesis	LeuC isopropylmalate isomerase subunit
b0073	49.4	Building block biosynthesis	LeuB 3-isopropylmalate dehydrogenase
b0074	49.4	Building block biosynthesis	LeuA 2-isopropylmalate synthase
b0077	49.4	Building block biosynthesis	IlvI catalytic (large) subunit of acetolactate synthase III
b0078	49.4	Building block biosynthesis	IlvH regulatory (small) subunit of acetolactate synthase III
b0621	49.4	Carbon compound utilization	DcuC dicarboxylate transporter
b0902	49.4	Energy metabolism (carbon)	PflA pyruvate formate-lyase activating enzyme
b0903	49.4	Carbon compound utilization	PflB pyruvate formate-lyase (inactive)
b0904	49.4	Carbon compound utilization	FocA formate FNT transporter
b1588	49.4	Energy metabolism (carbon)	YnfF oxidoreductase subunit
b1589	49.4	Energy metabolism (carbon)	DmsB oxidoreductase, Fe-S subunit paralog of DmsB
b1590	49.4	Energy metabolism (carbon)	DmsC DMSO reductase anchor subunit, paralog of DmsC
b2492	49.4	Electrochemical potential driven transporters	FocB formate FNT transporter
b2599	49.4	Building block biosynthesis	PheA chorismate mutase/prephenate dehyratase
b3454	49.4	Carbon compound utilization	LivF branched chain amino acids ABC transporter/leucine ABC transporter subunit
b3455	49.4	Carbon compound utilization	LivG branched chain amino acids ABC transporter/leucine ABC transporter subunit
b3456	49.4	Building block biosynthesis	LivM branched chain amino acids ABC transporter/leucine ABC transporter subunit
b3457	49.4	Building block biosynthesis	LivH branched chain amino acids ABC transporter/leucine ABC transporter subunit
b3458	49.4	Building block biosynthesis	LivK branched chain amino acids ABC transporter/leucine ABC transporter subunit
b3460	49.4	Building block biosynthesis	LivJ branched chain amino acids ABC transporter/leucine ABC transporter subunit
b3951	49.4	Energy metabolism (carbon)	PflD formate acetyltransferase 2
b3952	49.4	Energy metabolism (carbon)	PflC probable pyruvate formate lyase 2 activating enzyme
b4054	49.4	Building block biosynthesis	TyrB tyrosine aminotransferase
b4238	49.4	Building block biosynthesis	NrdD ribonucleoside-triphosphate reductase
Fnr	49.4	Energy metabolism (carbon)	Fnr transcriptional dual regulator
GlnB	49.4	Building block biosynthesis	GlnB protein PII
GlnD	49.4	Building block biosynthesis	GlnD uridylyltransferase/uridylyl-removing enzyme
Lrp	49.4	Building block biosynthesis	Lrp transcriptional dual regulator
b2797	49.3	Carbon compound utilization	SdaB L-serine deaminase II
RbsR	49.3	Carbon compound utilization	RbsR transcriptional repressor
b1991	49.2	Building block biosynthesis	CobT nicotinate-nucleotide dimethylbenzimidazole phosphoribosyltransferase
b1992	49.2	Building block biosynthesis	CobS cobalamin 5'-phosphate synthase/cobalamin synthase
b1993	49.2	Building block biosynthesis	CobU cobinamide-P guanylyltransferase/cobinamide kinase
b1817	49.1	Carbon compound utilization	ManX mannose PTS permease
b1818	49.1	Carbon compound utilization	ManY mannose PTS permease
b1819	49.1	Carbon compound utilization	ManZ mannose PTS permease
GcvA	49.1	Carbon compound utilization	GcvA transcriptional dual regulator
MarA	49.1	RNA related	MarA transcriptional dual regulator
b0383	49	Metabolism of other compounds	PhoA alkaline phosphatase
b3691	49	Carbon compound utilization	DgoT galactonate MFS transporter
b3692	49	Carbon compound utilization	DgoA 2-oxo-3-deoxygalactonate 6-phosphate aldolase subunit
b3693	49	Carbon compound utilization	DgoK 2-dehydro-3-deoxygalactonate kinase
b3725	49	Metabolism of other compounds	PstB phosphate ABC transporter subunit
b3726	49	Metabolism of other compounds	PstA phosphate ABC transporter subunit
b3727	49	Metabolism of other compounds	PstC phosphate ABC transporter
b3728	49	Metabolism of other compounds	PstS phosphate ABC transporter
Fis	49	DNA related	Fis DNA binding transcriptional dual regulator
GlnG	49	Building block biosynthesis	NtrC transcriptional dual regulator
PhoB	49	Metabolism of other compounds	PhoB transcriptional dual regulator
PhoR	49	Metabolism of other compounds	PhoR transcriptional dual regulator
b3528	0	Carbon compound utilization	DctA dicarboxylate DAACS transporter
b3942	0	Protection	KatG bifunctional hydroperoxidase I
b4111	0	Building block biosynthesis	ProP proline/betaine (osmosensory) MFS transporter subunit
b4123	0	Carbon compound utilization	DcuB dicarboxylate Dcu transporter
CRP_noMAN	0	Transcription Factor	Crp no mannose
CRP_noSUCC	0	Transcription Factor	Crp no succinate
BirA	0	Building block biosynthesis	BirA bifunctional biotin-[acetyl-CoA-carboxylase] ligase and transcriptional repressor

## Sheet: GO categories
			percent of environments in which gene is expressed
GO category (original; w/o formatting)	GO category	no. genes in model	1	51% to 49%	0
RNA related	RNA related	24	0	7	0
Central intermediary metabolism	Central intermediary metabolism	45	0	6	0
Carbon compound utilization	Carbon compound utilization	238	5	78	2
Building block biosynthesis	Building block biosynthesis	140	7	44	2
Electrochemical potential driven transporters	Electrochemical potential driven transporters	6	0	1	0
Primary Active Transporters	Primary Active Transporters	7	0	6	0
Cytoplasm	Cytoplasm	1	0	1	0
Metabolism of other compounds	Metabolism of other compounds	26	0	10	0
Macromolecule degradation	Macromolecule degradation	5	0	0	0
Energy metabolism (carbon)	Energy metabolism (carbon)	102	2	18	0
Unknown	Unknown	1	0	0	0
Protection	Protection	3	0	1	1
cryptic genes	cryptic genes	1	0	1	0
Putative uncharacterized transport protein	Putative uncharacterized transport protein	1	0	0	0
Type of regulation	Type of regulation	3	0	1	0
Adaptation to stress	Adaptation to stress	1	0	0	0
Channel-type Transporters	Channel-type Transporters	1	0	0	0
Group Translocators	Group Translocators	3	0	0	0
Protein related	Protein related	1	0	0	0
Transcription Factor	Transcription Factor	17	0	0	2
DNA related	DNA related	2	0	2	0
Macromolecules (cellular constituent) biosynthesis	Macromolecules (cellular constituent) biosynthesis	1	0	0	0
	Total	629	14	176	7
