# Supplementary material for: Functional States of the Genome-Scale Escherichia Coli Transcriptional Regulatory System
Source: PLoS Comput Biol. 2009 Jun 5;5(6):e1000403. doi: 10.1371/journal.pcbi.1000403 (PMC2685017; doi:10.1371/journal.pcbi.1000403)
Supplement: Dataset S6 — Details about the clusters contained in Figure S1. The gene expression correlation matrix was clustered, using standard hierarchical clustering techniques described in Text S3 and as shown in the resultant dendrogram in Figure S1. Details about the clusters highlighted in Figure S1 are presented. (0.14 MB XLS) [file pcbi.1000403.s006.xls]

## Sheet: Expression correlation clusters
Cluster ID			1			2			3			4			5			6			7			8			9			10			11			12
Genes	GO category	Validated?	NarL	Energy metabolism (carbon)	1	b1646	Protection	0	b0721	Energy metabolism (carbon)	1	b0336	Central intermediary metabolism	1	b1189	Carbon compound utilization	0	AppY	RNA related	1	b3500	Building block biosynthesis	1	b0388	Building block biosynthesis	1	b3572	Building block biosynthesis	0	AllS	Central intermediary metabolism	#N/A	b0365	Carbon compound utilization	1	b3748	Carbon compound utilization	1
			b2276	Energy metabolism (carbon)	0	b0312	Central intermediary metabolism	1	b0722	Energy metabolism (carbon)	1	b0337	Central intermediary metabolism	1	b1850	Carbon compound utilization	1	b2224	Carbon compound utilization	0	b0019	Electrochemical potential driven transporters	1	b1704	Building block biosynthesis	0	b3454	Carbon compound utilization	1	b0516	Carbon compound utilization	0	Cbl	Building block biosynthesis	1	b3750	Carbon compound utilization	1
			b2277	Energy metabolism (carbon)	0	b3605	Energy metabolism (carbon)	0	b0723	Energy metabolism (carbon)	1	b2938	Carbon compound utilization	1	b3437	Central intermediary metabolism	1	b2223	Carbon compound utilization	0	b0978	Energy metabolism (carbon)	0	b1264	Building block biosynthesis	0	b3460	Building block biosynthesis	0	b0517	Carbon compound utilization	1	b0366	Carbon compound utilization	1	b3752	Carbon compound utilization	1
			b2278	Energy metabolism (carbon)	0	b0221	Carbon compound utilization	0	b0724	Energy metabolism (carbon)	1	b2557	Building block biosynthesis	1	CRP_GLCN	Transcription Factor	#N/A	b2222	Carbon compound utilization	0	b0979	Energy metabolism (carbon)	0	b1263	Building block biosynthesis	0	b3458	Building block biosynthesis	1	b4117	Carbon compound utilization	1	b0367	Carbon compound utilization	1	b3751	Carbon compound utilization	1
			b2279	Energy metabolism (carbon)	0	b0430	Energy metabolism (carbon)	1	Fis	DNA related	1	b2500	Building block biosynthesis	1	GntT	Electrochemical potential driven transporters	1	b2221	Carbon compound utilization	0	b0980	Metabolism of other compounds	0	b1262	Building block biosynthesis	0	b3457	Building block biosynthesis	1	AdiY	RNA related	0	b0368	Carbon compound utilization	1	b3749	Carbon compound utilization	1
			b2280	Energy metabolism (carbon)	0	b0431	Energy metabolism (carbon)	1	b2904	Carbon compound utilization	0	b2499	Building block biosynthesis	1	b1851	Energy metabolism (carbon)	1	AtoS	Carbon compound utilization	0	b3519	Carbon compound utilization	1	b1261	Building block biosynthesis	0	b3456	Building block biosynthesis	1	b4131	Carbon compound utilization	0	b3607	Building block biosynthesis	1	b3670	Building block biosynthesis	0
			b2281	Energy metabolism (carbon)	0	b0432	Energy metabolism (carbon)	1	b2905	Carbon compound utilization	0	b2476	Building block biosynthesis	1	b2507	Building block biosynthesis	1	AtoC	Carbon compound utilization	0	b1897	Central intermediary metabolism	1	b1260	Building block biosynthesis	0	b3455	Carbon compound utilization	1	b4132	Building block biosynthesis	0	b2764	Metabolism of other compounds	1	b3671	Building block biosynthesis	0
			b2282	Energy metabolism (carbon)	0	b0428	Building block biosynthesis	1	b2903	Carbon compound utilization	1	b2312	Building block biosynthesis	1	b2508	Building block biosynthesis	1	b2096	Carbon compound utilization	1	b1896	Central intermediary metabolism	1	b0754	Building block biosynthesis	0	b0078	Building block biosynthesis	1	b0972	Energy metabolism (carbon)	1	b2763	Metabolism of other compounds	1	b1015	Building block biosynthesis	1
			b2283	Energy metabolism (carbon)	0	b0429	Energy metabolism (carbon)	1				b2311	Energy metabolism (carbon)	1	b2965	Carbon compound utilization	1	b2095	Carbon compound utilization	1	b1732	Protection	1	b0112	Building block biosynthesis	0	b0077	Building block biosynthesis	1	b0973	Energy metabolism (carbon)	1	b2762	Metabolism of other compounds	1	b1014	Carbon compound utilization	1
			b2284	Energy metabolism (carbon)	0	b1109	Energy metabolism (carbon)	1				b1849	Building block biosynthesis	1	b3806	Type of regulation	1	b2094	Carbon compound utilization	1	b1519	Central intermediary metabolism	1	b3161	Building block biosynthesis	0	b0074	Building block biosynthesis	1	b0974	Energy metabolism (carbon)	1	b2752	Metabolism of other compounds	1	b2393	Central intermediary metabolism	1
			b2285	Energy metabolism (carbon)	0	b1612	Energy metabolism (carbon)	1				b4005	Building block biosynthesis	1	b0124	Central intermediary metabolism	0	b2093	Carbon compound utilization	1	b1197	Carbon compound utilization	1				b0073	Building block biosynthesis	1	b3111	Carbon compound utilization	0	b2751	Metabolism of other compounds	1	b3831	Carbon compound utilization	1
			b2286	Energy metabolism (carbon)	0	b2210	Energy metabolism (carbon)	1				b1207	Central intermediary metabolism	1	b0907	Building block biosynthesis	1	b2092	Carbon compound utilization	1	RpoS	RNA related	1				b0072	Building block biosynthesis	1	b4139	Carbon compound utilization	1	b2750	Metabolism of other compounds	1	CRP_noGLCN	Transcription Factor	#N/A
			b2287	Energy metabolism (carbon)	0	b2234	Building block biosynthesis	1				b1131	Building block biosynthesis	1	b1817	Carbon compound utilization	1	b2091	Carbon compound utilization	1	b0871	Energy metabolism (carbon)	1				GlnB	Building block biosynthesis	1	b3112	Carbon compound utilization	0	b2421	Building block biosynthesis	1	GntR	Energy metabolism (carbon)	1
			b2288	Energy metabolism (carbon)	0	b2235	Building block biosynthesis	0				b0523	Building block biosynthesis	1	b1818	Carbon compound utilization	1	b0347	Carbon compound utilization	0	b1748	Carbon compound utilization	0				Lrp	Building block biosynthesis	1	ArcA	RNA related	0	b2425	Metabolism of other compounds	1	b3870	Building block biosynthesis	1
			b3893	Energy metabolism (carbon)	0	b3236	Carbon compound utilization	1				b0522	Building block biosynthesis	1	b1819	Carbon compound utilization	1	b0352	Carbon compound utilization	0	b1747	Carbon compound utilization	1				GlnD	Building block biosynthesis	1	Fnr	Energy metabolism (carbon)	0	b2424	Metabolism of other compounds	1	b3709	Building block biosynthesis	1
			b3894	Energy metabolism (carbon)	0	b3603	Carbon compound utilization	0				b3642	Building block biosynthesis	1	IclR	Central intermediary metabolism	1	b0351	Carbon compound utilization	0	b1746	Carbon compound utilization	1				b0071	Building block biosynthesis	1	b0621	Carbon compound utilization	1	b2423	Metabolism of other compounds	1	b3708	Carbon compound utilization	1
			b3892	Energy metabolism (carbon)	0	b2976	Central intermediary metabolism	0				b4245	Building block biosynthesis	1	FadR	Carbon compound utilization	1	b0350	Carbon compound utilization	0	b1745	Carbon compound utilization	1				NRI_low	Transcription Factor	#N/A	b4238	Building block biosynthesis	0	b2422	Metabolism of other compounds	1	b1190	Carbon compound utilization	1
						b2975	Carbon compound utilization	0				b4244	Building block biosynthesis	1				b0349	Carbon compound utilization	0	b1744	Carbon compound utilization	1				Nac	Metabolism of other compounds	1	b0902	Energy metabolism (carbon)	0	b2414	Building block biosynthesis	1	b0125	Central intermediary metabolism	1
												b0104	Building block biosynthesis	0				MhpR	Carbon compound utilization	1	b1493	Carbon compound utilization	0				NRI_hi	Transcription Factor	#N/A	b0904	Carbon compound utilization	1	b3917	Metabolism of other compounds	1	FeaB	Carbon compound utilization	1
																		b0348	Carbon compound utilization	0	b3517	Carbon compound utilization	0				b3744	Building block biosynthesis	0	b0903	Carbon compound utilization	1	CysB	Building block biosynthesis	1	FeaR	Carbon compound utilization	1
																		PdhR	Energy metabolism (carbon)	1	b4115	Building block biosynthesis	0				AsnC	Building block biosynthesis	0	b1588	Energy metabolism (carbon)	1	b2413	Metabolism of other compounds	1	CRP_noGLC	Transcription Factor	#N/A
																		b2538	Carbon compound utilization	1							GlnG	Building block biosynthesis	1	b1589	Energy metabolism (carbon)	1				Crp	RNA related	1
																		b2539	Carbon compound utilization	1										b1590	Energy metabolism (carbon)	1				b1386	Carbon compound utilization	1
																		b2540	Carbon compound utilization	1										b3952	Energy metabolism (carbon)	0				b2796	Building block biosynthesis	1
																		b2541	Carbon compound utilization	1										b3951	Energy metabolism (carbon)	0				b2841	Carbon compound utilization	1
																		b2542	Carbon compound utilization	1										b2492	Electrochemical potential driven transporters	0				b2927	Building block biosynthesis	1
																		HcaR	Carbon compound utilization	0										b2799	Carbon compound utilization	0				b3425	Energy metabolism (carbon)	1
																		MtlR	Carbon compound utilization	0										b3061	Energy metabolism (carbon)	1				b3428	Macromolecule degradation	1
																		b0732	Carbon compound utilization	1										b3062	Energy metabolism (carbon)	1				b4321	Electrochemical potential driven transporters	1
																		b0731	Carbon compound utilization	1										b1701	Carbon compound utilization	1				b2239	Central intermediary metabolism	1
																		DeoR	Central intermediary metabolism	1										b3366	Energy metabolism (carbon)	0				b2957	Central intermediary metabolism	0
																		b3902	Carbon compound utilization	1										b3365	Energy metabolism (carbon)	0				b2240	Energy metabolism (carbon)	1
																		b3904	Carbon compound utilization	1										b1227	Energy metabolism (carbon)	1				b3588	Central intermediary metabolism	1
																		RhaR	Carbon compound utilization	1										b1226	Energy metabolism (carbon)	0				b4382	Carbon compound utilization	1
																		RhaS	Carbon compound utilization	1										b1225	Energy metabolism (carbon)	0				b2143	Carbon compound utilization	1
																		b3907	Carbon compound utilization	1										b1224	Energy metabolism (carbon)	0				b3575	Central intermediary metabolism	1
																		b3903	Carbon compound utilization	1										b4194	Group Translocators	1				b0343	Carbon compound utilization	1
																		b2987	Metabolism of other compounds	1										b4196	Carbon compound utilization	1				b0344	Carbon compound utilization	1
																		CadC	Carbon compound utilization	1										b4198	Carbon compound utilization	1				b2150	Carbon compound utilization	0
																		b0114	Carbon compound utilization	1										b4197	Carbon compound utilization	1				b2149	Carbon compound utilization	0
																		Surplus_PYR	Transcription Factor	#N/A										b4195	Group Translocators	1				b2148	Carbon compound utilization	1
																		b0115	Carbon compound utilization	1										b4193	Group Translocators	1				b4039	Energy metabolism (carbon)	1
																		b0931	Central intermediary metabolism	1										b4069	Carbon compound utilization	0				b4040	Energy metabolism (carbon)	1
																		b2574	Building block biosynthesis	1										b4067	Electrochemical potential driven transporters	1				b2232	Energy metabolism (carbon)	1
																		ArgR	Building block biosynthesis	0										b3368	Building block biosynthesis	0				b3845	Carbon compound utilization	1
																		b4322	Carbon compound utilization	1										b3367	Metabolism of other compounds	1				b3846	Carbon compound utilization	1
																		b4323	Carbon compound utilization	1										b1475	Energy metabolism (carbon)	0				b4014	Central intermediary metabolism	0
																		b3093	Carbon compound utilization	1										b1474	Energy metabolism (carbon)	0				b4015	Central intermediary metabolism	0
																		b3092	Carbon compound utilization	1										b1476	Energy metabolism (carbon)	0				b2342	Carbon compound utilization	1
																		b3091	Carbon compound utilization	1										b1233	Unknown	0				b2341	Carbon compound utilization	1
																		b1521	Carbon compound utilization	1										b1223	Metabolism of other compounds	0				b1805	Carbon compound utilization	1
																		b0004	Building block biosynthesis	0																b0030	Central intermediary metabolism	1
																		b0003	Building block biosynthesis	0																Mlc	Macromolecules (cellular constituent) biosynthesis	1
																		b0002	Building block biosynthesis	0																b0651	Central intermediary metabolism	1
																		b3653	Building block biosynthesis	0																b0652	Building block biosynthesis	1
																		DcuR	Energy metabolism (carbon)	#N/A																b0653	Building block biosynthesis	1
																		DcuS	Energy metabolism (carbon)	#N/A																b0654	Building block biosynthesis	1
																		b4152	Energy metabolism (carbon)	0																b0655	Primary Active Transporters	1
																		b4154	Energy metabolism (carbon)	0																b1524	Carbon compound utilization	1
																		b4153	Energy metabolism (carbon)	0																b2097	Carbon compound utilization	0
																		b4151	Energy metabolism (carbon)	0
																		b4122	Energy metabolism (carbon)	0
																		b1276	Energy metabolism (carbon)	0
																		SoxS	RNA related	1
																		SoxR	RNA related	1
																		OxyR	RNA related	1
																		Fur	RNA related	1
																		b4239	Carbon compound utilization	1
																		b4240	Carbon compound utilization	1
																		KdgR	RNA related	#N/A
																		RbsR	Carbon compound utilization	1
																		RpiR	Carbon compound utilization	1
																		b2366	Carbon compound utilization	0
																		DsdC	Carbon compound utilization	0
																		UhpA	Carbon compound utilization	1
																		UhpB	Carbon compound utilization	1
																		b3666	Carbon compound utilization	1
																		b2964	Central intermediary metabolism	1
																		b4381	Carbon compound utilization	1
																		b4384	Central intermediary metabolism	1
																		b4383	Carbon compound utilization	1
																		b0945	Building block biosynthesis	1
																		b1062	Building block biosynthesis	1
																		b2066	Central intermediary metabolism	1
																		LacI	Carbon compound utilization	1
																		GalS	Carbon compound utilization	1
																		GalR	Carbon compound utilization	1
																		Rob	DNA related	1
																		b1611	Energy metabolism (carbon)	0
																		b3908	Adaptation to stress	1
																		MarA	RNA related	1
																		FadR2	Transcription Factor	#N/A
																		NhaR	RNA related	1
																		b1761	Building block biosynthesis	0
																		CpxR	Macromolecule degradation	1
																		CytR	Central intermediary metabolism	1
																		TdcA	Carbon compound utilization	1
																		TdcR	Carbon compound utilization	1
																		b4192	Carbon compound utilization	1
																		b2797	Carbon compound utilization	1
																		b2344	Carbon compound utilization	0
																		GlcC	Carbon compound utilization	1
																		GlpR	Energy metabolism (carbon)	0
																		UlaR	RNA related	#N/A
																		GutR	Carbon compound utilization	#N/A
																		BetI	RNA related	0
																		MalI	Carbon compound utilization	1
																		b1907	Building block biosynthesis	1
																		b2601	Building block biosynthesis	1
																		b2600	Building block biosynthesis	1
																		b4054	Building block biosynthesis	1
																		b2599	Building block biosynthesis	1
																		b0314	Central intermediary metabolism	1
																		TorR	Energy metabolism (carbon)	1
																		TorS	Energy metabolism (carbon)	1
																		b0997	Energy metabolism (carbon)	1
																		b0996	Energy metabolism (carbon)	1
																		GcvA	Carbon compound utilization	0
																		b1623	Central intermediary metabolism	1
																		PurR	Carbon compound utilization	1
																		b0677	Central intermediary metabolism	1
																		b0679	Carbon compound utilization	1
																		b0678	Central intermediary metabolism	1
																		b0341	Central intermediary metabolism	1
																		CynR	Central intermediary metabolism	1
																		b0340	Central intermediary metabolism	1
																		b4265	Electrochemical potential driven transporters	1
																		b4267	Carbon compound utilization	1
																		IdnR	Carbon compound utilization	1
																		b4266	Carbon compound utilization	1
																		b0615	Central intermediary metabolism	0
																		CitB	RNA related	0
																		CitA	Protein related	0
																		b0617	Central intermediary metabolism	0
																		b0616	Central intermediary metabolism	0
																		b0612	Carbon compound utilization	1
																		MngR	Carbon compound utilization	#N/A
																		b3600	Carbon compound utilization	0
																		b3599	Carbon compound utilization	0
																		b2407	Central intermediary metabolism	1
																		XapR	Central intermediary metabolism	1
																		b2406	Carbon compound utilization	1
																		TreR	Central intermediary metabolism	1
																		b3909	Carbon compound utilization	1
																		b3526	Carbon compound utilization	1
																		b4120	Carbon compound utilization	1
																		MelR	Carbon compound utilization	1
																		b4119	Carbon compound utilization	1
																		b1091	Building block biosynthesis	1
																		b1092	Building block biosynthesis	1
																		b0180	Building block biosynthesis	0
																		b0954	Building block biosynthesis	0
																		b1093	Building block biosynthesis	0
																		b1095	Building block biosynthesis	0
																		b1288	Building block biosynthesis	0
																		b2323	Building block biosynthesis	0
																		b0052	Building block biosynthesis	1
																		RpoE	RNA related	1
																		b2564	Building block biosynthesis	1
																		b4177	Building block biosynthesis	1
																		ExuR	Carbon compound utilization	1
																		UxuR	RNA related	1
																		b3128	Carbon compound utilization	1
																		b3126	Carbon compound utilization	1
																		b3125	Carbon compound utilization	1
																		b3124	Carbon compound utilization	1
																		SdaR	Type of regulation	#N/A
																		b2787	Carbon compound utilization	1
																		b4085	Carbon compound utilization	1
																		b4087	Carbon compound utilization	1
																		b4090	Carbon compound utilization	1
																		b4088	Carbon compound utilization	1
																		b4086	Carbon compound utilization	1
																		b0335	Cytoplasm	1
																		b0334	Carbon compound utilization	1
																		b0333	Carbon compound utilization	1
																		b0331	Carbon compound utilization	1
																		b1676	Energy metabolism (carbon)	1
																		Surplus_FDP	Transcription Factor	#N/A
																		b2167	Carbon compound utilization	1
																		b2169	Carbon compound utilization	1
																		b2168	Carbon compound utilization	1
																		b1101	Carbon compound utilization	1
																		b3567	Carbon compound utilization	1
																		b3566	Carbon compound utilization	1
																		b3565	Carbon compound utilization	1
																		b3568	Carbon compound utilization	1
																		b4031	Carbon compound utilization	1
																		XylR	Carbon compound utilization	1
																		b3564	Carbon compound utilization	1
No. genes	GO category	No. validated	17	Energy metabolism (carbon)	1	8	Energy metabolism (carbon)	11	4	Energy metabolism (carbon)	6	14	Building block biosynthesis	18	7	Carbon compound utilization	14	106	Carbon compound utilization	134	9	Carbon compound utilization	14	10	Building block biosynthesis	1	17	Building block biosynthesis	16	21	Energy metabolism (carbon)	24	12	Metabolism of other compounds	21	27	Carbon compound utilization	50
		Total	0	Carbon compound utilization	17	4	Carbon compound utilization	18	3	Carbon compound utilization	8	3	Central intermediary metabolism	19	3	Building block biosynthesis	16	25	Building block biosynthesis	180	3	Energy metabolism (carbon)	21	0	Carbon compound utilization	10	2	Carbon compound utilization	20	16	Carbon compound utilization	50	5	Building block biosynthesis	21	10	Building block biosynthesis	58
		Percent	0	Building block biosynthesis	5.88235	3	Building block biosynthesis	61.1111	1	DNA related	75	1	Carbon compound utilization	94.7368	3	Central intermediary metabolism	87.5	19	Central intermediary metabolism	74.4444	3	Central intermediary metabolism	66.6667	0	Energy metabolism (carbon)	10	2	Transcription Factor	80	3	Building block biosynthesis	48	4	Carbon compound utilization	100	10	Central intermediary metabolism	86.2069
		Rank	0	Central intermediary metabolism	12	2	Central intermediary metabolism	9	0	Building block biosynthesis	6	1	Energy metabolism (carbon)	2	1	Energy metabolism (carbon)	3	16	Energy metabolism (carbon)	7	2	Building block biosynthesis	8	0	Central intermediary metabolism	11	1	Metabolism of other compounds	5	3	Group Translocators	10	0	Energy metabolism (carbon)	1	6	Energy metabolism (carbon)	4
			0	Metabolism of other compounds		1	Protection		0	Central intermediary metabolism		0	Metabolism of other compounds		1	Transcription Factor		3	Transcription Factor		1	Metabolism of other compounds		0	Metabolism of other compounds		0	Energy metabolism (carbon)		2	Metabolism of other compounds		0	Central intermediary metabolism		2	Transcription Factor
			0	RNA related		0	Metabolism of other compounds		0	Metabolism of other compounds		0	RNA related		1	Electrochemical potential driven transporters		13	RNA related		1	RNA related		0	RNA related		0	Central intermediary metabolism		2	RNA related		0	RNA related		1	RNA related
			0	Transcription Factor		0	RNA related		0	RNA related		0	Transcription Factor		1	Type of regulation		0	Primary Active Transporters		1	Electrochemical potential driven transporters		0	Transcription Factor		0	RNA related		2	Electrochemical potential driven transporters		0	Transcription Factor		1	Primary Active Transporters
			0	Primary Active Transporters		0	Transcription Factor		0	Transcription Factor		0	Primary Active Transporters		0	Metabolism of other compounds		1	Electrochemical potential driven transporters		1	Protection		0	Primary Active Transporters		0	Primary Active Transporters		1	Central intermediary metabolism		0	Primary Active Transporters		1	Electrochemical potential driven transporters
			0	Electrochemical potential driven transporters		0	Primary Active Transporters		0	Primary Active Transporters		0	Electrochemical potential driven transporters		0	RNA related		1	Macromolecule degradation		0	Transcription Factor		0	Electrochemical potential driven transporters		0	Electrochemical potential driven transporters		1	Unknown		0	Electrochemical potential driven transporters		1	Macromolecule degradation
			0	Macromolecule degradation		0	Electrochemical potential driven transporters		0	Electrochemical potential driven transporters		0	Macromolecule degradation		0	Primary Active Transporters		0	Macromolecules (cellular constituent) biosynthesis		0	Primary Active Transporters		0	Macromolecule degradation		0	Macromolecule degradation		0	Transcription Factor		0	Macromolecule degradation		1	Macromolecules (cellular constituent) biosynthesis
			0	Group Translocators		0	Macromolecule degradation		0	Macromolecule degradation		0	Group Translocators		0	Macromolecule degradation		1	Metabolism of other compounds		0	Macromolecule degradation		0	Group Translocators		0	Group Translocators		0	Primary Active Transporters		0	Group Translocators		0	Metabolism of other compounds
			0	Protection		0	Group Translocators		0	Group Translocators		0	Protection		0	Group Translocators		0	Group Translocators		0	Group Translocators		0	Protection		0	Protection		0	Macromolecule degradation		0	Protection		0	Group Translocators
			0	Type of regulation		0	Type of regulation		0	Protection		0	Type of regulation		0	Protection		0	Protection		0	Type of regulation		0	Type of regulation		0	Type of regulation		0	Protection		0	Type of regulation		0	Protection
			0	DNA related		0	DNA related		0	Type of regulation		0	DNA related		0	DNA related		1	Type of regulation		0	DNA related		0	DNA related		0	DNA related		0	Type of regulation		0	DNA related		0	Type of regulation
			0	Cytoplasm		0	Cytoplasm		0	Cytoplasm		0	Cytoplasm		0	Cytoplasm		1	DNA related		0	Cytoplasm		0	Cytoplasm		0	Cytoplasm		0	DNA related		0	Cytoplasm		0	DNA related
			0	Putative uncharacterized transport protein		0	Putative uncharacterized transport protein		0	Putative uncharacterized transport protein		0	Putative uncharacterized transport protein		0	Putative uncharacterized transport protein		1	Cytoplasm		0	Putative uncharacterized transport protein		0	Putative uncharacterized transport protein		0	Putative uncharacterized transport protein		0	Cytoplasm		0	Putative uncharacterized transport protein		0	Cytoplasm
			0	Adaptation to stress		0	Adaptation to stress		0	Adaptation to stress		0	Adaptation to stress		0	Adaptation to stress		0	Putative uncharacterized transport protein		0	Adaptation to stress		0	Adaptation to stress		0	Adaptation to stress		0	Putative uncharacterized transport protein		0	Adaptation to stress		0	Putative uncharacterized transport protein
			0	Macromolecules (cellular constituent) biosynthesis		0	Macromolecules (cellular constituent) biosynthesis		0	Macromolecules (cellular constituent) biosynthesis		0	Macromolecules (cellular constituent) biosynthesis		0	Macromolecules (cellular constituent) biosynthesis		1	Adaptation to stress		0	Macromolecules (cellular constituent) biosynthesis		0	Macromolecules (cellular constituent) biosynthesis		0	Macromolecules (cellular constituent) biosynthesis		0	Adaptation to stress		0	Macromolecules (cellular constituent) biosynthesis		0	Adaptation to stress
			0	Unknown		0	Unknown		0	Unknown		0	Unknown		0	Unknown		0	Unknown		0	Unknown		0	Unknown		0	Unknown		0	Macromolecules (cellular constituent) biosynthesis		0	Unknown		0	Unknown
			0	cryptic genes		0	cryptic genes		0	cryptic genes		0	cryptic genes		0	cryptic genes		0	cryptic genes		0	cryptic genes		0	cryptic genes		0	cryptic genes		0	cryptic genes		0	cryptic genes		0	cryptic genes
			0	Channel-type Transporters		0	Channel-type Transporters		0	Channel-type Transporters		0	Channel-type Transporters		0	Channel-type Transporters		0	Channel-type Transporters		0	Channel-type Transporters		0	Channel-type Transporters		0	Channel-type Transporters		0	Channel-type Transporters		0	Channel-type Transporters		0	Channel-type Transporters
			0	Protein related		0	Protein related		0	Protein related		0	Protein related		0	Protein related		1	Protein related		0	Protein related		0	Protein related		0	Protein related		0	Protein related		0	Protein related		0	Protein related
Total			17			18			8			19			17			190			21			10			22			51			21			60			269

## Sheet: Gene-GO category assignments
Gene name	GO category
AdiY	RNA related
AllR	RNA related
AllS	Central intermediary metabolism
AppY	RNA related
AraC	Carbon compound utilization
ArcA	RNA related
ArgR	Building block biosynthesis
AsnC	Building block biosynthesis
AtoC	Carbon compound utilization
AtoS	Carbon compound utilization
b0002	Building block biosynthesis
b0003	Building block biosynthesis
b0004	Building block biosynthesis
b0019	Electrochemical potential driven transporters
b0030	Central intermediary metabolism
b0031	Building block biosynthesis
b0032	Building block biosynthesis
b0033	Building block biosynthesis
b0036	Carbon compound utilization
b0038	Carbon compound utilization
b0040	Carbon compound utilization
b0052	Building block biosynthesis
b0061	Carbon compound utilization
b0062	Carbon compound utilization
b0063	Carbon compound utilization
b0071	Building block biosynthesis
b0072	Building block biosynthesis
b0073	Building block biosynthesis
b0074	Building block biosynthesis
b0077	Building block biosynthesis
b0078	Building block biosynthesis
b0104	Building block biosynthesis
b0112	Building block biosynthesis
b0114	Carbon compound utilization
b0115	Carbon compound utilization
b0118	Carbon compound utilization
b0124	Central intermediary metabolism
b0125	Central intermediary metabolism
b0180	Building block biosynthesis
b0197	Primary Active Transporters
b0198	Primary Active Transporters
b0199	Primary Active Transporters
b0221	Carbon compound utilization
b0273	Building block biosynthesis
b0312	Central intermediary metabolism
b0314	Central intermediary metabolism
b0331	Carbon compound utilization
b0333	Carbon compound utilization
b0334	Carbon compound utilization
b0335	Cytoplasm
b0336	Central intermediary metabolism
b0337	Central intermediary metabolism
b0340	Central intermediary metabolism
b0341	Central intermediary metabolism
b0343	Carbon compound utilization
b0344	Carbon compound utilization
b0347	Carbon compound utilization
b0348	Carbon compound utilization
b0349	Carbon compound utilization
b0350	Carbon compound utilization
b0351	Carbon compound utilization
b0352	Carbon compound utilization
b0365	Carbon compound utilization
b0366	Carbon compound utilization
b0367	Carbon compound utilization
b0368	Carbon compound utilization
b0383	Metabolism of other compounds
b0388	Building block biosynthesis
b0403	Macromolecule degradation
b0428	Building block biosynthesis
b0429	Energy metabolism (carbon)
b0430	Energy metabolism (carbon)
b0431	Energy metabolism (carbon)
b0432	Energy metabolism (carbon)
b0505	Carbon compound utilization
b0507	Carbon compound utilization
b0509	Carbon compound utilization
b0512	Carbon compound utilization
b0514	Carbon compound utilization
b0516	Carbon compound utilization
b0517	Carbon compound utilization
b0522	Building block biosynthesis
b0523	Building block biosynthesis
b0583	Building block biosynthesis
b0593	Building block biosynthesis
b0594	Building block biosynthesis
b0595	Building block biosynthesis
b0596	Building block biosynthesis
b0612	Carbon compound utilization
b0615	Central intermediary metabolism
b0616	Central intermediary metabolism
b0617	Central intermediary metabolism
b0621	Carbon compound utilization
b0651	Central intermediary metabolism
b0652	Building block biosynthesis
b0653	Building block biosynthesis
b0654	Building block biosynthesis
b0655	Primary Active Transporters
b0677	Central intermediary metabolism
b0678	Central intermediary metabolism
b0679	Carbon compound utilization
b0696	Primary Active Transporters
b0697	Primary Active Transporters
b0698	Primary Active Transporters
b0721	Energy metabolism (carbon)
b0722	Energy metabolism (carbon)
b0723	Energy metabolism (carbon)
b0724	Energy metabolism (carbon)
b0731	Carbon compound utilization
b0732	Carbon compound utilization
b0754	Building block biosynthesis
b0757	Carbon compound utilization
b0758	Carbon compound utilization
b0759	Carbon compound utilization
b0871	Energy metabolism (carbon)
b0894	Energy metabolism (carbon)
b0895	Energy metabolism (carbon)
b0896	Energy metabolism (carbon)
b0902	Energy metabolism (carbon)
b0903	Carbon compound utilization
b0904	Carbon compound utilization
b0907	Building block biosynthesis
b0931	Central intermediary metabolism
b0945	Building block biosynthesis
b0954	Building block biosynthesis
b0972	Energy metabolism (carbon)
b0973	Energy metabolism (carbon)
b0974	Energy metabolism (carbon)
b0978	Energy metabolism (carbon)
b0979	Energy metabolism (carbon)
b0980	Metabolism of other compounds
b0996	Energy metabolism (carbon)
b0997	Energy metabolism (carbon)
b1014	Carbon compound utilization
b1015	Building block biosynthesis
b1062	Building block biosynthesis
b1091	Building block biosynthesis
b1092	Building block biosynthesis
b1093	Building block biosynthesis
b1095	Building block biosynthesis
b1101	Carbon compound utilization
b1109	Energy metabolism (carbon)
b1131	Building block biosynthesis
b1189	Carbon compound utilization
b1190	Carbon compound utilization
b1197	Carbon compound utilization
b1207	Central intermediary metabolism
b1223	Metabolism of other compounds
b1224	Energy metabolism (carbon)
b1225	Energy metabolism (carbon)
b1226	Energy metabolism (carbon)
b1227	Energy metabolism (carbon)
b1233	Unknown
b1260	Building block biosynthesis
b1261	Building block biosynthesis
b1262	Building block biosynthesis
b1263	Building block biosynthesis
b1264	Building block biosynthesis
b1276	Energy metabolism (carbon)
b1288	Building block biosynthesis
b1386	Carbon compound utilization
b1474	Energy metabolism (carbon)
b1475	Energy metabolism (carbon)
b1476	Energy metabolism (carbon)
b1493	Carbon compound utilization
b1519	Central intermediary metabolism
b1521	Carbon compound utilization
b1524	Carbon compound utilization
b1588	Energy metabolism (carbon)
b1589	Energy metabolism (carbon)
b1590	Energy metabolism (carbon)
b1611	Energy metabolism (carbon)
b1612	Energy metabolism (carbon)
b1621	Carbon compound utilization
b1622	Building block biosynthesis
b1623	Central intermediary metabolism
b1646	Protection
b1676	Energy metabolism (carbon)
b1701	Carbon compound utilization
b1702	Central intermediary metabolism
b1704	Building block biosynthesis
b1732	Protection
b1744	Carbon compound utilization
b1745	Carbon compound utilization
b1746	Carbon compound utilization
b1747	Carbon compound utilization
b1748	Carbon compound utilization
b1761	Building block biosynthesis
b1805	Carbon compound utilization
b1814	Carbon compound utilization
b1817	Carbon compound utilization
b1818	Carbon compound utilization
b1819	Carbon compound utilization
b1849	Building block biosynthesis
b1850	Carbon compound utilization
b1851	Energy metabolism (carbon)
b1896	Central intermediary metabolism
b1897	Central intermediary metabolism
b1898	Carbon compound utilization
b1899	Carbon compound utilization
b1900	Carbon compound utilization
b1901	Carbon compound utilization
b1907	Building block biosynthesis
b1991	Building block biosynthesis
b1992	Building block biosynthesis
b1993	Building block biosynthesis
b2066	Central intermediary metabolism
b2087	Carbon compound utilization
b2090	Carbon compound utilization
b2091	Carbon compound utilization
b2092	Carbon compound utilization
b2093	Carbon compound utilization
b2094	Carbon compound utilization
b2095	Carbon compound utilization
b2096	Carbon compound utilization
b2097	Carbon compound utilization
b2143	Carbon compound utilization
b2148	Carbon compound utilization
b2149	Carbon compound utilization
b2150	Carbon compound utilization
b2167	Carbon compound utilization
b2168	Carbon compound utilization
b2169	Carbon compound utilization
b2210	Energy metabolism (carbon)
b2221	Carbon compound utilization
b2222	Carbon compound utilization
b2223	Carbon compound utilization
b2224	Carbon compound utilization
b2232	Energy metabolism (carbon)
b2234	Building block biosynthesis
b2235	Building block biosynthesis
b2239	Central intermediary metabolism
b2240	Energy metabolism (carbon)
b2241	Energy metabolism (carbon)
b2242	Energy metabolism (carbon)
b2243	Energy metabolism (carbon)
b2276	Energy metabolism (carbon)
b2277	Energy metabolism (carbon)
b2278	Energy metabolism (carbon)
b2279	Energy metabolism (carbon)
b2280	Energy metabolism (carbon)
b2281	Energy metabolism (carbon)
b2282	Energy metabolism (carbon)
b2283	Energy metabolism (carbon)
b2284	Energy metabolism (carbon)
b2285	Energy metabolism (carbon)
b2286	Energy metabolism (carbon)
b2287	Energy metabolism (carbon)
b2288	Energy metabolism (carbon)
b2306	Carbon compound utilization
b2307	Building block biosynthesis
b2308	Building block biosynthesis
b2309	Building block biosynthesis
b2310	Building block biosynthesis
b2311	Energy metabolism (carbon)
b2312	Building block biosynthesis
b2323	Building block biosynthesis
b2341	Carbon compound utilization
b2342	Carbon compound utilization
b2344	Carbon compound utilization
b2366	Carbon compound utilization
b2393	Central intermediary metabolism
b2406	Carbon compound utilization
b2407	Central intermediary metabolism
b2413	Metabolism of other compounds
b2414	Building block biosynthesis
b2421	Building block biosynthesis
b2422	Metabolism of other compounds
b2423	Metabolism of other compounds
b2424	Metabolism of other compounds
b2425	Metabolism of other compounds
b2476	Building block biosynthesis
b2492	Electrochemical potential driven transporters
b2499	Building block biosynthesis
b2500	Building block biosynthesis
b2507	Building block biosynthesis
b2508	Building block biosynthesis
b2538	Carbon compound utilization
b2539	Carbon compound utilization
b2540	Carbon compound utilization
b2541	Carbon compound utilization
b2542	Carbon compound utilization
b2551	Building block biosynthesis
b2557	Building block biosynthesis
b2564	Building block biosynthesis
b2574	Building block biosynthesis
b2599	Building block biosynthesis
b2600	Building block biosynthesis
b2601	Building block biosynthesis
b2702	Carbon compound utilization
b2703	Carbon compound utilization
b2704	Carbon compound utilization
b2705	Carbon compound utilization
b2719	Energy metabolism (carbon)
b2720	Energy metabolism (carbon)
b2721	Energy metabolism (carbon)
b2722	Energy metabolism (carbon)
b2723	Energy metabolism (carbon)
b2724	Energy metabolism (carbon)
b2750	Metabolism of other compounds
b2751	Metabolism of other compounds
b2752	Metabolism of other compounds
b2762	Metabolism of other compounds
b2763	Metabolism of other compounds
b2764	Metabolism of other compounds
b2787	Carbon compound utilization
b2796	Building block biosynthesis
b2797	Carbon compound utilization
b2799	Carbon compound utilization
b2800	Carbon compound utilization
b2801	Carbon compound utilization
b2802	Carbon compound utilization
b2803	Carbon compound utilization
b2818	cryptic genes
b2838	Building block biosynthesis
b2841	Carbon compound utilization
b2903	Carbon compound utilization
b2904	Carbon compound utilization
b2905	Carbon compound utilization
b2926	Energy metabolism (carbon)
b2927	Building block biosynthesis
b2938	Carbon compound utilization
b2957	Central intermediary metabolism
b2964	Central intermediary metabolism
b2965	Carbon compound utilization
b2975	Carbon compound utilization
b2976	Central intermediary metabolism
b2987	Metabolism of other compounds
b2994	Energy metabolism (carbon)
b2997	Energy metabolism (carbon)
b3008	Carbon compound utilization
b3061	Energy metabolism (carbon)
b3062	Energy metabolism (carbon)
b3073	Central intermediary metabolism
b3091	Carbon compound utilization
b3092	Carbon compound utilization
b3093	Carbon compound utilization
b3111	Carbon compound utilization
b3112	Carbon compound utilization
b3124	Carbon compound utilization
b3125	Carbon compound utilization
b3126	Carbon compound utilization
b3128	Carbon compound utilization
b3161	Building block biosynthesis
b3236	Carbon compound utilization
b3359	Building block biosynthesis
b3365	Energy metabolism (carbon)
b3366	Energy metabolism (carbon)
b3367	Metabolism of other compounds
b3368	Building block biosynthesis
b3416	Macromolecule degradation
b3417	Macromolecule degradation
b3425	Energy metabolism (carbon)
b3426	Energy metabolism (carbon)
b3428	Macromolecule degradation
b3437	Central intermediary metabolism
b3450	Energy metabolism (carbon)
b3451	Energy metabolism (carbon)
b3452	Energy metabolism (carbon)
b3453	Energy metabolism (carbon)
b3454	Carbon compound utilization
b3455	Carbon compound utilization
b3456	Building block biosynthesis
b3457	Building block biosynthesis
b3458	Building block biosynthesis
b3460	Building block biosynthesis
b3500	Building block biosynthesis
b3517	Carbon compound utilization
b3519	Carbon compound utilization
b3526	Carbon compound utilization
b3564	Carbon compound utilization
b3565	Carbon compound utilization
b3566	Carbon compound utilization
b3567	Carbon compound utilization
b3568	Carbon compound utilization
b3572	Building block biosynthesis
b3575	Central intermediary metabolism
b3579	Putative uncharacterized transport protein
b3581	Carbon compound utilization
b3583	Carbon compound utilization
b3588	Central intermediary metabolism
b3599	Carbon compound utilization
b3600	Carbon compound utilization
b3603	Carbon compound utilization
b3605	Energy metabolism (carbon)
b3607	Building block biosynthesis
b3616	Carbon compound utilization
b3617	Carbon compound utilization
b3642	Building block biosynthesis
b3653	Building block biosynthesis
b3666	Carbon compound utilization
b3670	Building block biosynthesis
b3671	Building block biosynthesis
b3691	Carbon compound utilization
b3692	Carbon compound utilization
b3693	Carbon compound utilization
b3708	Carbon compound utilization
b3709	Building block biosynthesis
b3725	Metabolism of other compounds
b3726	Metabolism of other compounds
b3727	Metabolism of other compounds
b3728	Metabolism of other compounds
b3730	Carbon compound utilization
b3744	Building block biosynthesis
b3748	Carbon compound utilization
b3749	Carbon compound utilization
b3750	Carbon compound utilization
b3751	Carbon compound utilization
b3752	Carbon compound utilization
b3767	Building block biosynthesis
b3768	Building block biosynthesis
b3769	Building block biosynthesis
b3774	Building block biosynthesis
b3806	Type of regulation
b3829	Building block biosynthesis
b3831	Carbon compound utilization
b3845	Carbon compound utilization
b3846	Carbon compound utilization
b3870	Building block biosynthesis
b3892	Energy metabolism (carbon)
b3893	Energy metabolism (carbon)
b3894	Energy metabolism (carbon)
b3902	Carbon compound utilization
b3903	Carbon compound utilization
b3904	Carbon compound utilization
b3907	Carbon compound utilization
b3908	Adaptation to stress
b3909	Carbon compound utilization
b3917	Metabolism of other compounds
b3926	Central intermediary metabolism
b3939	Carbon compound utilization
b3940	Building block biosynthesis
b3951	Energy metabolism (carbon)
b3952	Energy metabolism (carbon)
b3957	Building block biosynthesis
b3958	Building block biosynthesis
b3959	Building block biosynthesis
b3960	Building block biosynthesis
b4005	Building block biosynthesis
b4013	Building block biosynthesis
b4014	Central intermediary metabolism
b4015	Central intermediary metabolism
b4019	Building block biosynthesis
b4024	Building block biosynthesis
b4031	Carbon compound utilization
b4032	Carbon compound utilization
b4033	Carbon compound utilization
b4034	Carbon compound utilization
b4035	Carbon compound utilization
b4036	Channel-type Transporters
b4039	Energy metabolism (carbon)
b4040	Energy metabolism (carbon)
b4054	Building block biosynthesis
b4067	Electrochemical potential driven transporters
b4069	Carbon compound utilization
b4079	Energy metabolism (carbon)
b4085	Carbon compound utilization
b4086	Carbon compound utilization
b4087	Carbon compound utilization
b4088	Carbon compound utilization
b4090	Carbon compound utilization
b4115	Building block biosynthesis
b4117	Carbon compound utilization
b4119	Carbon compound utilization
b4120	Carbon compound utilization
b4122	Energy metabolism (carbon)
b4131	Carbon compound utilization
b4132	Building block biosynthesis
b4139	Carbon compound utilization
b4151	Energy metabolism (carbon)
b4152	Energy metabolism (carbon)
b4153	Energy metabolism (carbon)
b4154	Energy metabolism (carbon)
b4177	Building block biosynthesis
b4192	Carbon compound utilization
b4193	Group Translocators
b4194	Group Translocators
b4195	Group Translocators
b4196	Carbon compound utilization
b4197	Carbon compound utilization
b4198	Carbon compound utilization
b4238	Building block biosynthesis
b4239	Carbon compound utilization
b4240	Carbon compound utilization
b4244	Building block biosynthesis
b4245	Building block biosynthesis
b4254	Building block biosynthesis
b4265	Electrochemical potential driven transporters
b4266	Carbon compound utilization
b4267	Carbon compound utilization
b4321	Electrochemical potential driven transporters
b4322	Carbon compound utilization
b4323	Carbon compound utilization
b4381	Carbon compound utilization
b4382	Carbon compound utilization
b4383	Carbon compound utilization
b4384	Central intermediary metabolism
BetI	RNA related
CadC	Carbon compound utilization
CaiF	RNA related
Cbl	Building block biosynthesis
CitA	Protein related
CitB	RNA related
CpxR	Macromolecule degradation
Cra	Energy metabolism (carbon)
Crp	RNA related
CRP_GLCN	Transcription Factor
CRP_noARAB	Transcription Factor
CRP_noGL	Transcription Factor
CRP_noGLC	Transcription Factor
CRP_noGLCN	Transcription Factor
CRP_noGLT	Transcription Factor
CRP_noLAC	Transcription Factor
CRP_noMAL	Transcription Factor
CRP_noRIB	Transcription Factor
CRP_noXYL	Transcription Factor
CynR	Central intermediary metabolism
CysB	Building block biosynthesis
CytR	Central intermediary metabolism
DcuR	Energy metabolism (carbon)
DcuS	Energy metabolism (carbon)
DeoR	Central intermediary metabolism
DsdC	Carbon compound utilization
ExuR	Carbon compound utilization
FadR	Carbon compound utilization
FadR2	Transcription Factor
FeaB	Carbon compound utilization
FeaR	Carbon compound utilization
FhlA	Energy metabolism (carbon)
Fis	DNA related
Fnr	Energy metabolism (carbon)
FucR	Carbon compound utilization
Fur	RNA related
GalR	Carbon compound utilization
GalS	Carbon compound utilization
GatR	Carbon compound utilization
GcvA	Carbon compound utilization
GcvR	Carbon compound utilization
GlcC	Carbon compound utilization
GlnB	Building block biosynthesis
GlnD	Building block biosynthesis
GlnG	Building block biosynthesis
GlnL	Metabolism of other compounds
GlpR	Energy metabolism (carbon)
GntR	Energy metabolism (carbon)
GntT	Electrochemical potential driven transporters
GutM	Carbon compound utilization
GutR	Carbon compound utilization
HcaR	Carbon compound utilization
IclR	Central intermediary metabolism
IdnR	Carbon compound utilization
IlvY	Building block biosynthesis
KdgR	RNA related
KdpD	Type of regulation
KdpE	RNA related
LacI	Carbon compound utilization
Lrp	Building block biosynthesis
LysR	Building block biosynthesis
MalI	Carbon compound utilization
MalT	Carbon compound utilization
MarA	RNA related
MelR	Carbon compound utilization
MetJ	Building block biosynthesis
MetR	Building block biosynthesis
MhpR	Carbon compound utilization
Mlc	Macromolecules (cellular constituent) biosynthesis
MngR	Carbon compound utilization
MtlR	Carbon compound utilization
Nac	Metabolism of other compounds
NadR	RNA related
NagC	Central intermediary metabolism
NarL	Energy metabolism (carbon)
NhaR	RNA related
OmpR	RNA related
OxyR	RNA related
PdhR	Energy metabolism (carbon)
PhoB	Metabolism of other compounds
PhoR	Metabolism of other compounds
PurR	Carbon compound utilization
RbsR	Carbon compound utilization
RhaR	Carbon compound utilization
RhaS	Carbon compound utilization
Rob	DNA related
RpiR	Carbon compound utilization
RpoE	RNA related
RpoN	Metabolism of other compounds
RpoS	RNA related
SdaR	Type of regulation
SoxR	RNA related
SoxS	RNA related
Surplus_FDP	Transcription Factor
Surplus_PYR	Transcription Factor
TdcA	Carbon compound utilization
TdcR	Carbon compound utilization
TorR	Energy metabolism (carbon)
TorS	Energy metabolism (carbon)
TreR	Central intermediary metabolism
TrpR	Building block biosynthesis
TyrR	RNA related
UhpA	Carbon compound utilization
UhpB	Carbon compound utilization
UlaR	RNA related
UxuR	RNA related
XapR	Central intermediary metabolism
XylR	Carbon compound utilization
YiaJ	RNA related
NRI_hi	Transcription Factor
NRI_low	Transcription Factor

## Sheet: GO category breakdown
GO category	No. genes
Carbon compound utilization	231
Building block biosynthesis	131
Energy metabolism (carbon)	100
Central intermediary metabolism	45
Metabolism of other compounds	26
RNA related	24
Transcription Factor	15
Primary Active Transporters	7
Electrochemical potential driven transporters	6
Macromolecule degradation	5
Group Translocators	3
Protection	2
Type of regulation	3
DNA related	2
Cytoplasm	1
Putative uncharacterized transport protein	1
Adaptation to stress	1
Macromolecules (cellular constituent) biosynthesis	1
Unknown	1
cryptic genes	1
Channel-type Transporters	1
Protein related	1
Total	608
